# Supplementary material
Source: PubMed Central journal article supplement (PMC3241799)
Supplement: 1112742108_pnas.201112742SI.pdf [file 1112742108_pnas.201112742SI.pdf]

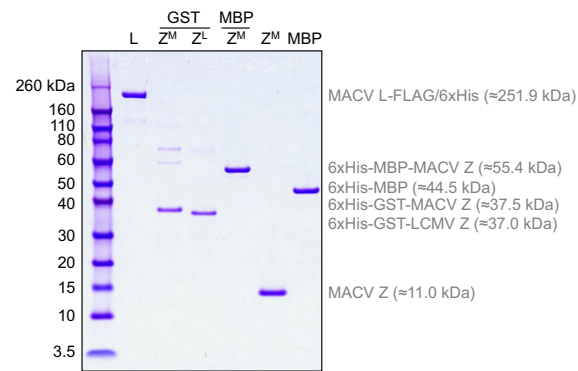

**Fig. S1.** Recombinant arenavirus protein purification. (A) Recombinant arenavirus proteins were purified as described in experimental procedures, and 2.0  $\mu\text{g}$  of each protein was analyzed by 4–12% gradient SDS/PAGE and Coomassie blue staining. The predicted molecular mass of each protein is indicated on the *Right*.

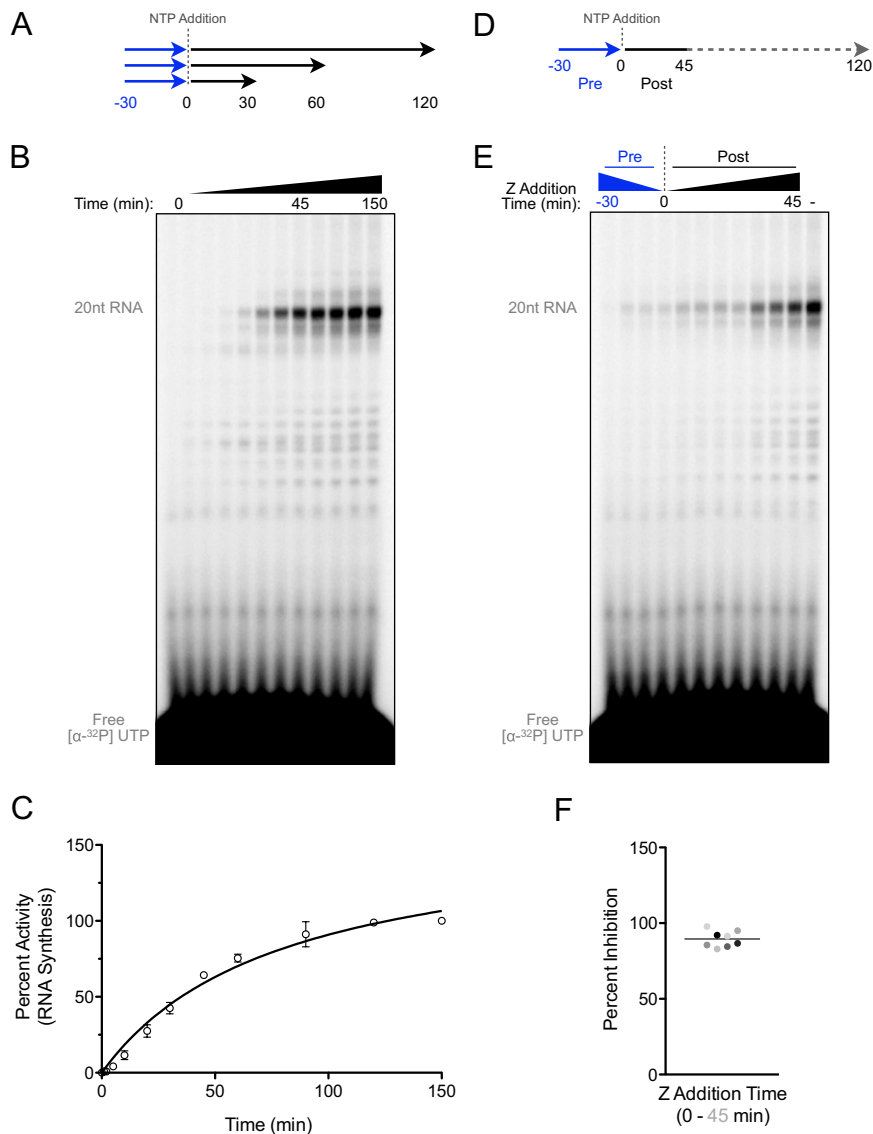

**Fig. S2.** Kinetics of MACV RNA synthesis and Z inhibition. (A) Schematic representation of MACV in vitro RNA synthesis time-course reactions. All reactions included GpC primer and were performed by first preincubating L and the RNA template at 25 °C for 30 min. Subsequently, NTPs and labeled [ $\alpha$ - $^{32}$ P]-UTP were added and reactions were shifted to 30 °C. Reactions were terminated at the designated time points, (B) analyzed, and (C) quantified as in Fig. 1. (D) Schematic representation of MACV in vitro RNA synthesis Z inhibition time-course reactions. RNA synthesis reactions were carried out as in A except reactions were supplemented with purified MACV Z at the designated time points before or after NTP addition. All reactions were terminated after a 120-min incubation at 30 °C and (E) analyzed as in Fig. 1. (F) The percentage of Z inhibition for each time point was calculated by determining the percentage of RNA synthesis following Z addition relative to the expected amount of RNA synthesis using the data from B. Each point represents an individual time point of Z addition from 0 to 45 min post-NTP addition and is color coded so that lighter shades represent later time points of Z addition.

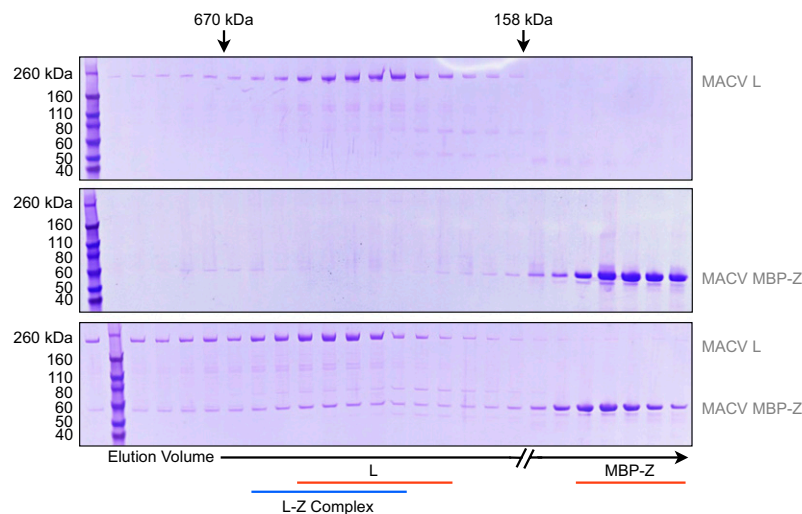

**Fig. S3.** L and Z form a heterodimeric complex. The molecular weight and stoichiometry of the Z-L complex was estimated by preincubating L and MBP-tagged Z and comparing the Superdex 200 gel-filtration elution profile of the complexed proteins with purified MACV L (L), MBP-tagged MACV Z (MBP-Z), and known molecular weight standards. Consecutive 0.5-mL fractions were collected and analyzed by gradient 4–12% SDS/PAGE and Coomassie stain.

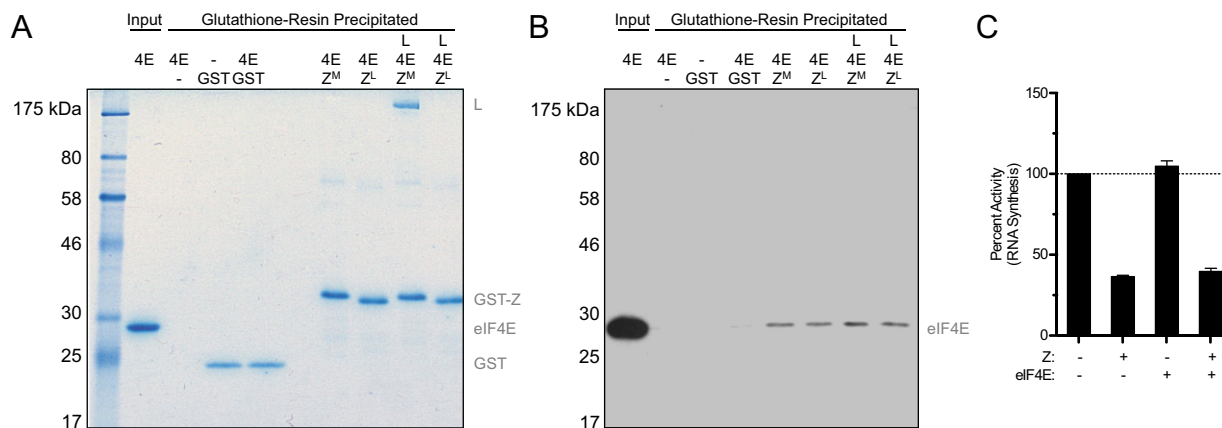

**Fig. S4.** MACV and LCMV Z-eIF4E interaction. (A) GST pull-down assay using purified components. Purified free GST (GST), GST-tagged MACV Z ( $Z^M$ ) or GST-tagged LCMV Z ( $Z^L$ ) were incubated alone or with eIF4E (4E) and/or MACV L (L) in the designated combinations before purification with glutathione resin. Pelleted resin was washed three times, and bound proteins were eluted and analyzed by 12% SDS/PAGE and colloidal Coomassie stain or (B) by  $\alpha$ -eIF4E immunoblot (5-min exposure). Input eIF4E corresponds to one-third of the total input protein in A or 10% of the total input protein in B. (C) In vitro RNA synthesis reactions supplemented with a recombinant GST-tagged MACV Z and eIF4E as indicated. Reactions contained a concentration of MACV Z (1.6  $\mu$ M) that results in ~60% inhibition of total RNA synthesis, and a threefold molar excess of eIF4E to maximize potential for eIF4E interference with Z-L complex formation.
